# Supplementary material
Source: publisher figshare collection journal article supplement (https://tandf.figshare.com/ndownloader/files/22658315)
Supplement: Supplementary file 1 [file 22658315]

Supplementary Material

In GenPE study, samples for cases and controls were obtained mostly between active labor and immediate puerperium; however, this information is not available for verification on these patients. One concern that needed to be addressed was if C-section could influence marker levels; results are displayed in table S1.

Table S1. Mode of delivery for included GenPE participants

| Characteristics of women | C-reactive protein (CRP) n (%) |             |         | Interleukin-6 (IL-6) n (%) |             |         |
|--------------------------|--------------------------------|-------------|---------|----------------------------|-------------|---------|
|                          | Cases                          | Controls    | p-value | Cases                      | Controls    | p-value |
|                          | (n = 899)                      | (n = 1,290) |         | (n = 844)                  | (n = 1,204) |         |
| Vaginal delivery         | 217 (25.4)                     | 680 (57.8)  | <0.0001 | 198 (24.7)                 | 631 (57.2)  | <0.0001 |
| Mode of delivery         | 636 (74.6)                     | 496 (42.2)  |         | 604 (75.3)                 | 472 (2.8)   |         |

Contrary to previous result (table S1), where there was a significant difference between cases and controls regarding mode of delivery, when we assessed the effect of this variables on markers levels, no statistical difference was found (table S2); and for this reason was not part of final association model.

Table S2. Effect of mode of delivery on CRP and IL-6 levels

| Risk factor      | N controls | CRP (mg/L)             |       | N controls | IL-6 (pg/mL)            |       |
|------------------|------------|------------------------|-------|------------|-------------------------|-------|
|                  |            | Effect                 | P-val |            | Effect                  | P-val |
|                  |            | (95%CI)                |       |            | (95%CI)                 |       |
| Mode of delivery | 1290       | -0.01<br>(-0.08, 0.09) | 0.628 | 1204       | -0.003<br>(-0.06, 0.05) | 0.791 |
